# Supplementary material
Source: Springer Nature journal article supplement (https://www.springermedizin.de/resource/supplementary/12985_2010_820_MOESM2_ESM.pdf/9609262)
Supplement: MOESM2 [file 9609262]

|                                 | 110               | 120                                      | 130                | 140           | 150    | 160       | 170   | 180   | 190   | 200   |
|---------------------------------|-------------------|------------------------------------------|--------------------|---------------|--------|-----------|-------|-------|-------|-------|
| A/California/04/2009 (H1N1)     | GAAAGAACACAGATCTT | GAGGCTCTCATGGAATGGCTAAAGACAAGACCAATCTTGT | CACCTCTGACTAAGGGAA | TTTTAGGATTTGT | TT     | CACGCTCAC |       |       |       |       |
| A/Nonthaburi/102/2009 (H1N1)    | .....             | .....                                    | .....              | .....         | .....  | .....     | ..... | ..... | ..... | ..... |
| A/Thailand/104/2009 (H1N1)      | .....             | .....                                    | .....              | .....         | .....  | .....     | ..... | ..... | ..... | ..... |
| A/New Caledonia/20/1999 (H1N1)  | .....             | T.C                                      | .....              | .....         | .....  | .....     | ..... | ..... | ..... | ..... |
| A/Solomon Islands/3/2006 (H1N1) | .....             | T.C                                      | .....              | G             | .....  | .....     | ..... | ..... | ..... | ..... |
| A/Brisbane/59/2007 (H1N1)       | .....             | T.C                                      | .....              | G             | .....  | .....     | ..... | ..... | ..... | ..... |
| A/Fujian/411/2002 (H3N2)        | .G                | A                                        | .....              | .....         | .....  | .....     | ..... | ..... | ..... | ..... |
| A/California/7/2004 (H3N2)      | .G                | A                                        | .....              | .....         | .....  | .....     | ..... | ..... | ..... | ..... |
| A/Brisbane/10/2007 (H3N2)       | .G                | A                                        | .....              | .....         | .....  | .....     | ..... | ..... | ..... | ..... |
| FluA F                          | .....             | .....                                    | .....              | .....         | .....  | .....     | ..... | ..... | ..... | ..... |
| FluA probe                      | -----             | -----                                    | -----              | -----         | -----  | -----     | ----- | ----- | ----- | ----- |
| Flu R                           | -----             | -----                                    | -----              | -----         | .....R | .....C    | ----- | ----- | ----- | ----- |

|                                 | 210                     | 220          | 230                        | 240                           | 250         | 260   | 270   | 280   | 290   | 300   |
|---------------------------------|-------------------------|--------------|----------------------------|-------------------------------|-------------|-------|-------|-------|-------|-------|
| A/California/04/2009 (H1N1)     | CGTGCCCGAGTGAGCGAGGACTG | CAGCGTAGACGC | TTTGTCCAAAATGCCCTAAATGGGAA | TGGGGACCCGAACAACATGGATAGAGCAG | TTAAACTATAC |       |       |       |       |       |
| A/Nonthaburi/102/2009 (H1N1)    | .....                   | .....        | .....                      | .....                         | .....       | ..... | ..... | ..... | ..... | ..... |
| A/Thailand/104/2009 (H1N1)      | .....                   | .....        | .....                      | .....                         | .....       | ..... | ..... | ..... | ..... | ..... |
| A/New Caledonia/20/1999 (H1N1)  | .....                   | .....        | .....                      | .....                         | .....       | ..... | ..... | ..... | ..... | ..... |
| A/Solomon Islands/3/2006 (H1N1) | .....                   | .....        | .....                      | .....                         | .....       | ..... | ..... | ..... | ..... | ..... |
| A/Brisbane/59/2007 (H1N1)       | .....                   | .....        | .....                      | .....                         | .....       | ..... | ..... | ..... | ..... | ..... |
| A/Fujian/411/2002 (H3N2)        | .....                   | .....        | .....                      | .....                         | .....       | ..... | ..... | ..... | ..... | ..... |
| A/California/7/2004 (H3N2)      | .....                   | .....        | .....                      | .....                         | .....       | ..... | ..... | ..... | ..... | ..... |
| A/Brisbane/10/2007 (H3N2)       | .....                   | .....        | .....                      | .....                         | .....       | ..... | ..... | ..... | ..... | ..... |
| FluA F                          | .....                   | .....        | .....                      | .....                         | .....       | ..... | ..... | ..... | ..... | ..... |
| FluA probe                      | -----                   | -----        | -----                      | -----                         | -----       | ----- | ----- | ----- | ----- | ----- |
| Flu R                           | -----                   | -----        | .....K                     | .....Y                        | -----       | ----- | ----- | ----- | ----- | ----- |

R = A or G  
K = T or G  
Y = C or T
